# Supplementary material for: Predictors of long-term symptom burden and quality of life in patients hospitalised with chest pain: a prospective observational study
Source: HighWire-hosted journal article supplement (doi:10.1136/bmjopen-2022-062302), 2022-07-01
Supplement: bmjopen-2022-062302supp001_data_supplement.pdf [file bmjopen-2022-062302supp001_data_supplement.pdf]

## Supplementary Material

### Supplementary Methods

1. Adjudication
2. Diagnostic definitions
3. Biochemical analysis

### Supplementary Tables

**Supplementary Table S1:** Characteristics of responders and non-responders at 3 months

**Supplementary Table S2:** RAND-12 scores in responders and in a normative population

**Supplementary Table S3:** Univariable linear regression analyses of candidate predictors and quality of life outcome scores.

**Supplementary Table S4:** Mediator analysis investigating which variables that could mediate the predictive value of an UAP diagnosis for the different outcomes (dependent variables). Variables that changed the unstandardized B more than 10% are marked\* below.

### Supplementary Methods

#### **Adjudication**

All routine clinical assessments were recorded and registered retrospectively. Demographic and clinical characteristics were obtained from electronic medical records. Two independent

cardiologists adjudicated the final diagnosis based on all available clinical, routine laboratory (including cTnT at admission and at 3 and 8–12 hours from admission), electrocardiogram (ECG), ultrasound, and imaging findings, including cardiac computed tomographic angiography and conventional angiography(1). A third adjudicator resolved disagreements. Specific diagnostic criteria were predefined for 22 different medical conditions based on guidelines that were available during planning of the study (see “Diagnostic definitions” below). NSTEMI was defined according to the third universal definition for MI, including a significant rise and fall of cTn with at least one value above the 99<sup>th</sup> percentile combined with symptoms of ischemia, ECG changes, and image evidence of loss of viable myocardium or intracoronary thrombus.(2) Delta values of 20% (baseline cTnT concentration >14 ng/L) or 50% (baseline cTnT concentration ≤14 ng/L) in serial cTnT measures were regarded as significant, as suggested by the ESC in 2012.(1, 2) Since 2012, several studies have found a significantly lower 99<sup>th</sup> percentile concentration of cTn for women compared with men,(3-5) but knowledge of sex-specific cutoffs for women regarding diagnosing NSTEMI is partial because of a lack of data on pathophysiology.(6) Consequently, we chose to apply a common cutoff for all patients.

### **Diagnostic definitions**

*Myocardial infarction* (AMI, MI): defined according to the third universal definition of myocardial infarction (7):

Detection of a rise and/or fall of cardiac biomarker values (preferably cardiac troponin) with at least one value above the 99<sup>th</sup> percentile upper reference limit (URL) and with at least one of the following:

1. Symptoms of ischemia
2. Development of pathologic Q waves in the electrocardiogram (ECG)
3. New or presumed new significant ST-Segment-T wave (ST-T) changes or new left bundle branch block (LBBB).
4. Identification of an intracoronary thrombus by angiography or autopsy
5. Imaging evidence of new loss of viable myocardium or a new regional wall motion abnormality

*Unstable angina pectoris (UAP)*: defined as symptoms suggestive of an ACS without elevation in biomarkers with or without ECG changes indicative of ischemia.(8)

*Stable angina* was defined as typical angina symptoms lasting >1 month without an increase in magnitude, duration or frequency of the pain and a known history of coronary artery disease.(9)

*Pericarditis* was diagnosed if at least two of four diagnostic criteria were present, as defined in several studies: typical pleuritic chest pain, detection of a pericardial rub on auscultation, typical ECG changes, new or increased amount of pericardial effusion on echocardiography.(10)

*Myocarditis* was diagnosed according to the position statement of ESC from 2013.(11)

*Takotsubo cardiomyopathy* was diagnosed with the modified criteria suggested by The Mayo Clinic in 2008.(12)

*Heart failure* was defined according to the ESC diagnostic criteria of 2016.(13)

*Atrial fibrillation, atrial flutter* and other supraventricular arrhythmias were diagnosed by ECG findings and the lack of symptoms and biochemical results supporting another disease.

*Aortic stenosis* and other valvular diseases were diagnosed in accordance with echocardiographic findings and a history supporting the valve disease as cause of the symptoms.(14)

*Myalgia* was defined as chest pain provoked by palpation in lack of cardiac disease.

*GERD* was based on gastroscopic findings, also in the lack of cardiac disease.

*Cholecystitis* were defined by the Tokyo Guidelines of 2006 while other abdominal diseases were defined according to operative, endoscopic or radiological findings.(15)

*Pneumonia* was defined by typical symptoms and a chest X-ray supporting the disease, while the diagnosis of both pulmonary embolism and pneumothorax was based on radiologic findings and the lack of concurrent cardiac disease.

*COPD* was defined in accordance with the criteria by Stephens MB from 2008.(16)

*NCCP* was defined as chest pain without any specific clinical, radiologic or biochemical findings.

### Biochemical analysis

Hs-cTnT was measured using the Roche Diagnostics hs-cTnT assay with limit of blank (LoB) 3 ng/L, limit of detection (LoD) 5 ng/L, 99th percentile 14 ng/L, measurement range 4 – 10 000 ng/L and 10% analytical within-series coefficient of variation ( $CV_A$ ) at 4.5 ng/L;  $CV_A$  was below 5% for concentrations of 10 ng/L or higher(17). Hs-cTnI was measured using the Abbott Diagnostics hs-cTnI assay. The assay has a LoB 0.9 ng/L, LoD 1.7 ng/L, 99th percentile 26 ng/L and measurement range 2-50 000 ng/L, with 10%  $CV_A$  at 4.6 ng/L(17).

Glucose, creatinine and lipids were measured using the Cobas 8000 from Roche Diagnostics. The glomerular filtration rate was estimated using the CKD-EPI (Chronic Kidney Disease Epidemiology Collaboration)(18) formula using an enzymatic isotope dilution mass spectrometry traceable creatinine assay (Roche Diagnostics) with a  $CV_A$  less than 3% for concentration > 60  $\mu\text{mol/L}$ .

## **Supplementary Tables**

**Supplementary Table S1.** Characteristics of responders and non-responders at 3 months. Continuous variables are reported as median values (25th percentile to 75th percentile), proportions are given as absolute numbers (percentages).

| <b>Parameter</b>                       | <b>Responder<br/>N=774 (51.9%)</b> | <b>Non-responder N=718<br/>(48.3%)</b> | <b>P-value</b> |
|----------------------------------------|------------------------------------|----------------------------------------|----------------|
| Age, median (25th to 75th percentile ) | 66 (57-73)                         | 58 (47-71)                             | <0.001         |
| Gender, female, n (%)                  | 305 (39.4)                         | 284 (39.6)                             | 0.953          |
| <b>Risk factors, n (%)</b>             |                                    |                                        |                |
| Hypertension                           | 351 (45.3)                         | 259 (36.1)                             | <0.001         |
| Hyperlipidemia (known)                 | 342 (44.2)                         | 237 (33.0)                             | <0.001         |
| Diabetes mellitus                      | 94 (12.1)                          | 82 (11.4)                              | 0.665          |
| Insulin-dependent                      | 25 (3.2)                           | 25 (3.5)                               | 0.787          |
| Family history (MI)                    | 142 (18.3)                         | 127 (17.7)                             | 0.494          |
| Unknown                                | 66 (8.5)                           | 74 (10.3)                              | 0.239          |
| Current smoker                         | 135 (17.4)                         | 147 (20.5)                             | 0.135          |
| Previous smoker                        | 355 (45.9)                         | 297 (41.4)                             | 0.080          |
| <b>Medical history, n (%)</b>          |                                    |                                        |                |
| Prior MI                               | 147 (19.0)                         | 137 (19.1)                             | 0.965          |
| Prior PCI                              | 167 (21.6)                         | 124 (17.3)                             | 0.036          |
| Prior CABG                             | 58 (7.5)                           | 52 (7.2)                               | 0.853          |
| Prior Heart Failure                    | 26 (3.4)                           | 25 (3.5)                               | 0.896          |
| Prior Stroke                           | 25 (3.2)                           | 17 (2.4)                               | 0.350          |
| Peripheral vascular disease            | 17 (2.2)                           | 12 (1.7)                               | 0.463          |
| Revascularization                      | 146 (18.9)                         | 72 (10.0)                              | <0.001         |
| <b>Biomarkers</b>                      |                                    |                                        |                |
| cTnT, ng/L                             | 8.0 (4.0-18.0)                     | 6.0 (3.0-14.0)                         | <0.001         |
| cTnI, ng/L                             | 3.8 (1.94-11.31)                   | 2.94 (1.50-7.50)                       | <0.001         |

**Supplementary Table S2:** RAND-12 scores in responders and in the normative population. Data are reported as median values (25<sup>th</sup> and 75<sup>th</sup> percentile).

|        | <b>Responders</b><br>N= 774 | <b>General population</b><br>N= 6240 | <b>P-value</b> |
|--------|-----------------------------|--------------------------------------|----------------|
| PCS-12 | 50 (37-59)                  | 52 (42-55)                           | 0.383          |
| MCS-12 | 51 (41-58)                  | 58 (54-61)                           | <0.001         |

**Supplementary Table S3.** Univariable linear regression analyses of candidate predictors and quality of life outcome scores.

|                              | SAQ7-AF |                |         |                              | SAQ7-QL |                |         |
|------------------------------|---------|----------------|---------|------------------------------|---------|----------------|---------|
| Variable                     | B       | 95% CI         | P-value | Variable                     | B       | 95% CI         | P-value |
| Age                          | -0.02   | -0.10, 0.06    | 0.676   | Age                          | 0.008   | -0.12, 0.14    | 0.898   |
| Gender                       | -0.14   | -2.87, 2.56    | 0.920   | Gender                       | -2.66   | -7.10, 1.79    | 0.241   |
| cTnT                         | 0.009   | -0.002, 0.02   | 0.116   | cTnT                         | 0.02    | 0.001, 0.4     | 0.037   |
| cTnI                         | 0.001   | 0.000, 0.001   | 0.115   | cTnI                         | 0.001   | 0.000, 0.002   | 0.049   |
| Prior MI                     | -6.44   | -9.79, -3.09   | <0.001  | Prior MI                     | -5.41   | -10.82, -0.002 | 0.050   |
| Prior PCI                    | -7.43   | -10.63, -4.23  | <0.001  | Prior PCI                    | -7.40   | -12.57, -2.24  | 0.005   |
| Prior CABG                   | -4.93   | -9.86, 0.012   | 0.051   | Prior CABG                   | -11.02  | -19.28, 2.75   | 0.009   |
| Prior Stroke                 | -1.95   | -9.37, 5.48    | 0.607   | Prior Stroke                 | -1.41   | -7.08, 4.25    | 0.624   |
| Prior Heart failure          | -0.52   | -9.37, 5.48    | 0.607   | Prior Heart failure          | -11.49  | -23.20, 0.22   | 0.054   |
| Hypertension                 | -4.06   | -6.716, -1.404 | 0.003   | Hypertension                 | -6.11   | -10.42, -1.79  | 0.006   |
| Current smoker               | -0.05   | -3.54, 3.45    | 0.980   | Current smoker               | -8.04   | -13.76, 2.32   | 0.006   |
| Reduced renal function       | -4.65   | -9.61, 0.31    | 0.066   | Reduced renal function       | -6.71   | -14.80, 1.36   | 0.103   |
| Diabetes                     | -4.97   | -9.02, -0.93   | 0.016   | Diabetes                     | -5.81   | -12.37, 0.74   | 0.082   |
| BMI                          | -0.24   | -0.63, 0.15    | 0.231   | BMI                          | -0.19   | -0.85, 0.47    | 0.577   |
| eGFR                         | 0.05    | -0.04, 0.15    | 0.280   | eGFR                         | 0.03    | -0.12, 0.19    | 0.667   |
| Revascularization            | 2.51    | -0.88, 5.89    | 0.146   | Revascularization            | 5.64    | 0.175, 11.11   | 0.043   |
| NSTEMI                       | 3.30    | -0.49, 7.09    | 0.088   | NSTEMI                       | 4.79    | -1.31, 10.90   | 0.124   |
| UAP                          | -9.16   | -12.66, -5.65  | <0.001  | UAP                          | -9.14   | -14.78, -3.50  | 0.002   |
| Non-coronary cardiac disease | -2.34   | -7.63, 2.95    | 0.386   | Non-coronary cardiac disease | -8.76   | -17.71, 0.19   | 0.055   |
| Non-cardiac disease          | 2.03    | -3.36, 7.42    | 0.460   | Non-cardiac disease          | 2.52    | -6.36, 11.40   | 0.578   |
| NCCP                         | 3.81    | 1.15, 6.47     | 0.005   | NCCP                         | 4.83    | 0.50, 9.16     | 0.029   |

|           | SAQ7-PL |               |         |           | SAQ7  |               |         |
|-----------|---------|---------------|---------|-----------|-------|---------------|---------|
| Variable  | B       | 95% CI        | P-value | Variable  | B     | 95% CI        | P-value |
| Age       | -0.31   | -0.43, -0.20  | <0.001  | Age       | -0.11 | -0.20, -0.02  | 0.018   |
| Gender    | -1.46   | -5.37, 2.42   | 0.461   | Gender    | -1.58 | -4.59, 1.43   | 0.304   |
| cTnT      | 0.006   | -0.009, 0.02  | 0.435   | cTnT      | 0.01  | -0.001, 0.023 | 0.068   |
| cTnI      | 0.0008  | -0.001, 0.001 | 0.426   | cTnI      | 0.001 | 0.000, 0.001  | 0.076   |
| Prior MI  | -11.40  | -16.19, -6.61 | <0.001  | Prior MI  | -7.94 | -11.66, -4.23 | <0.001  |
| Prior PCI | -9.74   | -14.38, -5.14 | <0.001  | Prior PCI | -8.20 | -11.74, -4.66 | <0.001  |



|                              |        |               |        |                              |        |               |        |
|------------------------------|--------|---------------|--------|------------------------------|--------|---------------|--------|
| Prior CABG                   | -16.81 | -23.99, -9.63 | <0.001 | Prior CABG                   | -9.13  | -14.66, -3.60 | 0.001  |
| Prior Stroke                 | -5.38  | -10.43, -0.33 | 0.037  | Prior Stroke                 | -3.13  | -7.33, 0.70   | 0.106  |
| Prior Heart failure          | -17.15 | -27.56, -6.74 | 0.001  | Prior Heart failure          | -10.14 | -18.16, -2.12 | 0.013  |
| Hypertension                 | -6.62  | -10.39, -2.85 | 0.001  | Hypertension                 | -5.01  | -7.95, -2.07  | 0.001  |
| Current smoker               | -5.49  | -10.50, -0.49 | 0.032  | Current smoker               | -3.54  | -7.41, 0.34   | 0.073  |
| Reduced renal function       | -16.64 | -24.02, -9.27 | <0.001 | Reduced renal function       | -8.64  | -14.11, -3.16 | 0.002  |
| Diabetes                     | -5.27  | -11.05, 0.52  | 0.074  | Diabetes                     | -4.93  | -9.41, -0.44  | 0.031  |
| BMI                          | -0.08  | -0.67, 0.52   | 0.806  | BMI                          | -0.15  | -0.59, 0.30   | 0.526  |
| eGFR                         | 0.33   | 0.19, 0.47    | <0.001 | eGFR                         | 0.13   | 0.02, 0.24    | 0.017  |
| Revascularization            | 3.48   | -1.37, 8.33   | 0.159  | Revascularization            | 4.10   | 0.29, 7.82    | 0.035  |
| NSTEMI                       | 3.34   | -2.08, 8.77   | 0.226  | NSTEMI                       | 4.10   | -0.12, 8.32   | 0.057  |
| UAP                          | -6.86  | -11.92, -1.81 | 0.008  | UAP                          | -8.70  | -12.59, -4.81 | <0.001 |
| Non-coronary cardiac disease | -8.02  | -15.2, -0.43  | 0.039  | Non-coronary cardiac disease | -5.86  | -11.80, 0.08  | 0.053  |
| Non-cardiac disease          | -2.17  | -9.86, 5.53   | 0.581  | Non-cardiac disease          | 1.44   | -4.63, 7.50   | 0.643  |
| NCCP                         | 4.93   | 1.14, 8.72    | 0.011  | NCCP                         | 4.33   | 1.38, 7.28    | 0.004  |

|                        | PCS-12 |              |         |                        | MCS-12 |              |         |
|------------------------|--------|--------------|---------|------------------------|--------|--------------|---------|
| Variable               | B      | 95% CI       | P-value | Variable               | B      | 95% CI       | P-value |
| Age                    | -0.03  | -0.09, 0.03  | 0.326   | Age                    | 0.002  | -0.06, 0.06  | 0.988   |
| Gender                 | -1.60  | -4.02, 0.83  | 0.196   | Gender                 | -1.79  | -4.24, 0.66  | 0.151   |
| cTnT                   | 0.01   | -0.002       | 0.103   | cTnT                   | 0.02   | 0.001, 0.03  | 0.052   |
| cTnI                   | 0.002  | 0.001, 0.005 | 0.070   | cTnI                   | 0.002  | 0.001, 0.005 | 0.064   |
| Prior MI               | -4.18  | -7.35, -1.01 | 0.010   | Prior MI               | -2.77  | -5.98, 0.45  | 0.092   |
| Prior PCI              | -3.57  | -6.62        | 0.021   | Prior PCI              | -2.40  | -5.49, 0.68  | 0.127   |
| Prior CABG             | -4.36  | -9.51, 0.79  | 0.097   | Prior CABG             | -1.49  | -6.71, 3.72  | 0.574   |
| Prior Stroke           | -1.586 | -3.99, 0.82  | 0.196   | Prior Stroke           | -2.34  | -4.76, 0.09  | 0.059   |
| Prior Heart failure    | -6.22  | -17.77, 5.33 | 0.290   | Prior Heart failure    | -4.89  | -16.56, 6.78 | 0.411   |
| Hypertension           | -3.86  | -6.20, -1.52 | 0.001   | Hypertension           | -2.12  | -4.50, 0.27  | 0.082   |
| Current smoker         | -2.68  | -5.76, 0.49  | 0.098   | Current smoker         | -3.77  | -6.91, -0.63 | 0.019   |
| Reduced renal function | -3.97  | -10.89, 2.96 | 0.259   | Reduced renal function | 2.15   | -5.16, 9.46  | 0.562   |
| Diabetes               | -4.70  | -8.43, -0.96 | 0.014   | Diabetes               | -2.44  | -6.23, 1.36  | 0.207   |
| BMI                    | -0.47  | -0.85, -0.09 | 0.015   | BMI                    | -0.30  | -0.69, 0.09  | 0.127   |
| eGFR                   | -0.002 | -0.12, 0.12  | 0.974   | eGFR                   | -0.10  | -0.22, 0.03  | 0.118   |
| Revascularization      | 2.71   | -0.39, 5.82  | 0.086   | Revascularization      | 2.77   | -0.37, 5.91  | 0.084   |
| NSTEMI                 | 3.04   | -0.71, 6.80  | 0.112   | NSTEMI                 | 3.18   | -0.61, 6.97  | 0.100   |

|                              |        |              |       |                              |        |             |       |
|------------------------------|--------|--------------|-------|------------------------------|--------|-------------|-------|
| UAP                          | -3.63  | -6.57, -0.69 | 0.016 | UAP                          | -0.97  | -3.97, 2.00 | 0.525 |
| Non-coronary cardiac disease | -0.004 | -5.17, 5.16  | 0.999 | Non-coronary cardiac disease | -0.86  | -6.07, 4.36 | 0.747 |
| Non-cardiac disease          | -1.96  | -7.02, 3.09  | 0.445 | Non-cardiac disease          | -0.520 | -5.63, 5.59 | 0.841 |
| NCCP                         | 1.62   | -0.76, 4.00  | 0.182 | NCCP                         | -0.42  | -2.83, 1.96 | 0.734 |

**Supplementary Table S4:** Mediator analysis investigating which variables that could mediate the predictive value of an UAP diagnosis for the different outcomes (dependent variables). Variables that changed the unstandardized B more than 10% are marked\* below.

| SAQ7-AF                             | B (unstandardized) | SE             | $\beta$ (standardized) | t                | P-value         |
|-------------------------------------|--------------------|----------------|------------------------|------------------|-----------------|
| UAP $\pm$ 10% B (-10.076 to -8.244) | -9.160             | 1.786          | -0.184                 | -5.129           | <0.001          |
| Revascularization* UAP              | 5.077<br>-10.426   | 1.742<br>1.835 | 0.107<br>-0.209        | 2.914<br>-5.681  | 0.004<br><0.001 |
| Age UAP                             | -0.006<br>-9.061   | 0.041<br>1.789 | -0.005<br>-0.182       | -0.143<br>-5.066 | 0.887<br><0.001 |
| Gender UAP                          | -1.015<br>-9.239   | 1.377<br>1.799 | -0.027<br>-0.186       | -0.737<br>-5.136 | 0.461<br><0.001 |
| cTnT UAP                            | 0.007<br>-9.098    | 0.005<br>1.793 | 0.048<br>-0.182        | 1.336<br>-5.075  | 0.182<br><0.001 |
| Prior MI UAP                        | -5.437<br>-8.353   | 1.697<br>1.788 | -0.115<br>-0.168       | -3.204<br>-4.672 | 0.001<br><0.001 |
| Prior CABG UAP                      | -2.339<br>-8.715   | 2.538<br>1.827 | -0.034<br>-0.175       | -0.921<br>-4.770 | 0.357<br><0.001 |
| Hypertension UAP                    | -3.450<br>-8.642   | 1.339<br>1.786 | -0.092<br>-0.174       | -2.576<br>-4.839 | 0.010<br><0.001 |
| Reduced renal function UAP          | -4.176<br>-8.824   | 2.494<br>2.386 | -0.075<br>-0.166       | -1.675<br>-3.698 | 0.095<br><0.001 |
| Diabetes UAP                        | -3.933<br>-8.714   | 2.042<br>1.791 | -0.069<br>-0.175       | -1.926<br>-4.865 | 0.054<br>-1.926 |

| SAQ7-QL                             | B (unstandardized) | SE             | $\beta$ (standardized) | t                | P-value         |
|-------------------------------------|--------------------|----------------|------------------------|------------------|-----------------|
| UAP $\pm$ 10% B (-10.067 to -8.228) | -9.143             | 2.872          | -0.119                 | -3.183           | 0.002           |
| Revascularization* UAP              | 8.526<br>-11.188   | 2.850<br>2.953 | 0.115<br>-0.145        | 2.992<br>-3.789  | 0.003<br><0.001 |
| Age UAP                             | 0.021<br>-9.014    | 0.066<br>2.880 | 0.012<br>-0.117        | 0.313<br>-3.130  | 0.754<br>0.002  |
| Gender UAP                          | -3.441<br>-9.428   | 2.260<br>2.887 | -0.057<br>-0.122       | -1.523<br>-3.266 | 0.128<br>0.001  |
| cTnT UAP                            | 0.017<br>-8.962    | 0.009<br>2.880 | 0.072<br>-0.116        | 1.930<br>-3.112  | 0.054<br>0.002  |
| Prior PCI* UAP                      | -5.876<br>-7.532   | 2.685<br>2.939 | -0.084<br>-0.098       | -2.189<br>-2.563 | 0.029<br>0.011  |
| Prior CABG* UAP                     | -8.779<br>-7.780   | 4.275<br>2.924 | -0.078<br>-0.101       | -2.054<br>-2.661 | 0.040<br>0.008  |
| Prior Heart failure UAP             | -12.017<br>-9.123  | 5.928<br>2.868 | -0.075<br>-0.118       | -2.027<br>-3.181 | 0.043<br>0.002  |
| Hypertension UAP                    | -5.548<br>-8.322   | 2.196<br>2.874 | -0.094<br>-0.108       | -2.527<br>-2.896 | 0.012<br>0.004  |

|                 |        |       |        |        |       |
|-----------------|--------|-------|--------|--------|-------|
| Current smoking | -8.155 | 2.897 | -0.105 | -2.815 | 0.005 |
| UAP             | -9.061 | 2.860 | -1.118 | -3.169 | 0.002 |
| Diabetes        | -4.763 | 3.338 | -0.053 | -1.427 | 0.154 |
| UAP             | -8.520 | 2.888 | -0.111 | -2.950 | 0.003 |

| <b>SAQ7-PL</b>                        | B<br>(unstandardized) | SE     | $\beta$ (standardized) | t      | P-value |
|---------------------------------------|-----------------------|--------|------------------------|--------|---------|
| UAP $\pm$ 10% B<br>(-7.550 to -6.177) | -6.864                | 2.574  | -0.098                 | -2.667 | 0.008   |
| Revascularization*                    | 5.485                 | 2.531  | 0.082                  | 2.167  | 0.031   |
| UAP                                   | -8.217                | 2.647  | 0.002                  | -3.104 | 0.002   |
| Age*                                  | -0.302                | -0.057 | -0.190                 | -5.271 | <0.001  |
| UAP                                   | -5.861                | 2.532  | -0.083                 | -2.315 | 0.021   |
| Gender                                | -2.074                | 1.980  | -0.039                 | -1.047 | 0.295   |
| UAP                                   | -7.102                | -7.102 | -0.101                 | -2.745 | 0.006   |
| cTnT                                  | 0.005                 | 0.008  | 0.024                  | 0.650  | 0.516   |
| UAP                                   | -7.052                | 2.573  | -0.101                 | -2.741 | 0.006   |
| Prior MI*                             | -10.772               | 2.453  | -0.160                 | -4.391 | <0.001  |
| UAP                                   | -5.446                | 2.559  | -0.077                 | -2.128 | 0.034   |
| Prior CABG*                           | -15.401               | 3.747  | -0.153                 | -4.110 | <0.001  |
| UAP                                   | -4.413                | 2.609  | -0.063                 | -1.691 | 0.091   |
| Prior Stroke                          | -5.219                | 2.563  | -0.074                 | -2.036 | 0.042   |
| UAP                                   | -6.669                | 2.566  | -0.095                 | -2.599 | 0.010   |
| Prior Heart failure                   | -17.492               | 5.282  | -0.120                 | -3.312 | 0.001   |
| UAP                                   | -6.995                | 2.555  | -0.100                 | -2.738 | 0.006   |
| Hypertension*                         | -6.159                | 1.926  | -0.117                 | -3.197 | 0.001   |
| UAP                                   | -5.949                | 2.569  | -0.085                 | -2.316 | 0.021   |
| Current smoking                       | -5.775                | 2.542  | -0.083                 | -2.272 | 0.023   |
| UAP                                   | -7.031                | 2.566  | -0.100                 | -2.740 | 0.006   |
| Reduced renal<br>function             | -16.257               | 3.751  | -0.196                 | -4.334 | <0.001  |
| UAP                                   | -6.192                | 3.491  | -0.080                 | -1.774 | 0.077   |
| Diabetes                              | -4.466                | 2.954  | -0.056                 | -1.512 | 0.131   |
| UAP                                   | -6.364                | 2.585  | -0.091                 | -2.462 | 0.014   |

| <b>SAQ7 summary</b>                   | B<br>(unstandardized) | SE    | $\beta$ (standardized) | t      | P-value |
|---------------------------------------|-----------------------|-------|------------------------|--------|---------|
| UAP $\pm$ 10% B<br>(-9.570 to -7.830) | -8.700                | 1.981 | -0.156                 | -4.391 | <0.001  |
| Revascularization*                    | 6.630                 | 1.949 | 0.124                  | 3.402  | 0.001   |
| UAP                                   | -10.309               | 2.033 | -0.184                 | -5.070 | <0.001  |
| Age                                   | -0.097                | 0.045 | -0.076                 | -2.147 | 0.032   |
| UAP                                   | -8.331                | 1.981 | -0.149                 | -4.205 | <0.001  |
| Gender                                | -2.382                | 1.527 | -0.056                 | -1.560 | 0.119   |
| UAP                                   | -8.945                | 1.994 | -0.160                 | -4.486 | <0.001  |
| cTnT                                  | 0.010                 | 0.006 | 0.058                  | 1.623  | 0.105   |
| UAP                                   | -8.675                | 1.987 | -0.155                 | -4.365 | <0.001  |

|                        |         |       |        |        |        |
|------------------------|---------|-------|--------|--------|--------|
| Prior MI*              | -7.100  | 1.886 | -0.133 | -3.764 | <0.001 |
| UAP                    | -7.728  | 1.979 | -0.138 | -3.906 | <0.001 |
| Prior CABG*            | -6.903  | 2.856 | -0.087 | -2.417 | 0.016  |
| UAP                    | -7.562  | 2.020 | -0.135 | -3.743 | <0.001 |
| Prior Heart failure    | -10.654 | 4.039 | -0.093 | -2.638 | 0.009  |
| UAP                    | -8.731  | 1.975 | -0.156 | -4.420 | <0.001 |
| Hypertension           | -4.448  | 1.489 | -0.106 | -2.987 | 0.003  |
| UAP                    | -8.026  | 1.981 | -0.144 | -4.052 | <0.001 |
| Current smoking        | -3.761  | 1.950 | -0.068 | -1.928 | 0.054  |
| UAP                    | -8.680  | 1.979 | -0.155 | -4.385 | <0.001 |
| Reduced renal function | -8.176  | 2.770 | -0.130 | -2.952 | 0.003  |
| UAP                    | -7.894  | 2.655 | -0.131 | -2.973 | 0.003  |
| Diabetes               | -3.940  | 2.275 | -0.062 | -1.732 | 0.084  |
| UAP                    | -8.218  | 1.991 | -0.147 | -4.128 | <0.001 |

| <b>PCS-12</b>                         | B<br>(unstandardized) | SE    | $\beta$ (standardized) | t      | P-value |
|---------------------------------------|-----------------------|-------|------------------------|--------|---------|
| UAP $\pm$ 10% B<br>(-3.994 to -3.268) | -3.631                | 1.497 | -0.124                 | -2.426 | 0.016   |
| Revascularization*                    | 3.990                 | 1.619 | 0.130                  | 2.464  | 0.014   |
| UAP                                   | -4.596                | 1.541 | -0.157                 | -2.982 | 0.003   |
| Age                                   | -0.028                | 0.031 | -0.046                 | -0.899 | 0.369   |
| UAP                                   | -3.554                | 1.499 | -0.121                 | -2.371 | 0.018   |
| Gender                                | -1.937                | 1.231 | -0.081                 | -1.574 | 0.116   |
| UAP                                   | -3.859                | 1.503 | -0.132                 | -2.567 | 0.011   |
| cTnT                                  | 0.011                 | 0.007 | 0.078                  | 1.521  | 0.129   |
| UAP                                   | -3.558                | 1.493 | 0.007                  | -2.383 | 0.018   |
| Prior MI*                             | -3.822                | 1.612 | -0.121                 | -2.371 | 0.018   |
| UAP                                   | -3.241                | 1.496 | -0.111                 | -2.166 | 0.031   |
| Hypertension*                         | -3.579                | 1.193 | -0.153                 | -3.001 | 0.003   |
| UAP                                   | -3.095                | 1.492 | -0.106                 | -2.075 | 0.039   |
| Current smoking                       | -2.628                | 1.579 | -0.085                 | -1.664 | 0.097   |
| UAP                                   | -3.599                | 1.494 | -0.123                 | -2.409 | 0.016   |
| Diabetes                              | -4.286                | 1.900 | -0.115                 | -2.256 | 0.025   |
| UAP                                   | -3.271                | 1.497 | -0.112                 | -2.185 | 0.029   |
| BMI                                   | -0.469                | 0.191 | -0.170                 | -2.457 | 0.015   |
| UAP                                   | -3.298                | 1.956 | -0.116                 | -1.686 | 0.093   |

| <b>MCS-12</b>                         | B<br>(unstandardized) | SE    | $\beta$ (standardized) | t      | P-value |
|---------------------------------------|-----------------------|-------|------------------------|--------|---------|
| UAP $\pm$ 10% B<br>(-1.067 to -0.873) | -0.970                | 1.524 | -0.033                 | -0.636 | 0.525   |
| Revascularization*                    | 3.234                 | 1.651 | 0.104                  | 1.959  | 0.051   |
| UAP                                   | -1.797                | 1.572 | -0.061                 | -1.143 | 0.254   |
| Age                                   | 0.001                 | 0.032 | 0.002                  | 0.039  | 0.969   |
| UAP                                   | -0.996                | 1.526 | -0.034                 | -0.653 | 0.514   |

|                 |        |       |        |        |       |
|-----------------|--------|-------|--------|--------|-------|
| Gender*         | -1.898 | 1.252 | -0.078 | -1.516 | 0.130 |
| UAP             | -1.243 | 1.529 | -0.042 | -0.813 | 0.417 |
| Prior Stroke    | -2.337 | 1.234 | -0.097 | -1.893 | 0.059 |
| UAP             | -0.992 | 1.518 | -0.034 | -0.654 | 0.514 |
| Current smoking | -3.767 | 1.600 | -0.120 | -2.354 | 0.019 |
| UAP             | -0.985 | 1.514 | -0.033 | -0.651 | 0.516 |

## References

1. Tjora HL, Steiro OT, Langorgen J, Bjorneklett R, Nygard OK, Renstrom R, et al. Aiming toWards Evidence baSed inTerpretation of Cardiac biOMarkers in patients pResenting with chest pain-the WESTCOR study: study design. *Scandinavian cardiovascular journal* : SCJ. 2019;1-6.
2. Thygesen K, Alpert JS, Jaffe AS, Simoons ML, Chaitman BR, White HD, et al. Third universal definition of myocardial infarction. *European heart journal*. 2012;33(20):2551-67.
3. Giannitsis E, Kurz K, Hallermayer K, Jarausch J, Jaffe AS, Katus HA. Analytical validation of a high-sensitivity cardiac troponin T assay. *Clin Chem*. 2010;56(2):254-61.
4. Saenger AK, Beyrau R, Braun S, Cooray R, Dolci A, Freidank H, et al. Multicenter analytical evaluation of a high-sensitivity troponin T assay. *Clin Chim Acta*. 2011;412(9-10):748-54.
5. Gore MO, Seliger SL, Defilippi CR, Nambi V, Christenson RH, Hashim IA, et al. Age- and sex-dependent upper reference limits for the high-sensitivity cardiac troponin T assay. *J Am Coll Cardiol*. 2014;63(14):1441-8.
6. Romiti GF, Cangemi R, Toriello F, Ruscio E, Sciomer S, Moscucci F, et al. Sex-Specific Cut-Offs for High-Sensitivity Cardiac Troponin: Is Less More? *Cardiovascular therapeutics*. 2019;2019:9546931.
7. Thygesen K, Alpert JS, Jaffe AS, Simoons ML, Chaitman BR, White HD, et al. Third universal definition of myocardial infarction. *Eur Heart J*. 2012;33(20):2551-67.
8. Roffi M, Patrono C, Collet JP, Mueller C, Valgimigli M, Andreotti F, et al. 2015 ESC Guidelines for the management of acute coronary syndromes in patients presenting without persistent ST-segment elevation: Task Force for the Management of Acute Coronary Syndromes in Patients Presenting without Persistent ST-Segment Elevation of the European Society of Cardiology (ESC). *Eur Heart J*. 2016;37(3):267-315.
9. Montalescot G, Sechtem U, Achenbach S, Andreotti F, Arden C, Budaj A, et al. 2013 ESC guidelines on the management of stable coronary artery disease: the Task Force on the management of stable coronary artery disease of the European Society of Cardiology. *Eur Heart J*. 2013;34(38):2949-3003.
10. Adler Y, Charron P, Imazio M, Badano L, Barón-Esquivias G, Bogaert J, et al. 2015 ESC Guidelines for the diagnosis and management of pericardial diseases: The Task Force for the Diagnosis and Management of Pericardial Diseases of the European Society of Cardiology (ESC) Endorsed by: The European Association for Cardio-Thoracic Surgery (EACTS). *Eur Heart J*. 2015;36(42):2921-64.
11. Caforio AL, Pankuweit S, Arbustini E, Basso C, Gimeno-Blanes J, Felix SB, et al. Current state of knowledge on aetiology, diagnosis, management, and therapy of myocarditis: a position statement of the European Society of Cardiology Working Group on Myocardial and Pericardial Diseases. *Eur Heart J*. 2013;34(33):2636-48, 48a-48d.
12. Prasad A, Lerman A, Rihal CS. Apical ballooning syndrome (Tako-Tsubo or stress cardiomyopathy): a mimic of acute myocardial infarction. *Am Heart J*. 2008;155(3):408-17.
13. Ponikowski P, Voors AA, Anker SD, Bueno H, Cleland JGF, Coats AJS, et al. 2016 ESC Guidelines for the diagnosis and treatment of acute and chronic heart failure: The Task Force for the diagnosis and treatment of acute and chronic heart failure of the European Society of Cardiology (ESC) Developed with the special contribution of the Heart Failure Association (HFA) of the ESC. *Eur Heart J*. 2016;37(27):2129-200.
14. Baumgartner H, Falk V, Bax JJ, De Bonis M, Hamm C, Holm PJ, et al. 2017 ESC/EACTS Guidelines for the management of valvular heart disease. *European Heart Journal*. 2017;38(36):2739-91.
15. Hirota M, Takada T, Kawarada Y, Nimura Y, Miura F, Hirata K, et al. Diagnostic criteria and severity assessment of acute cholecystitis: Tokyo Guidelines. *J Hepatobiliary Pancreat Surg*. 2007;14(1):78-82.
16. Stephens MB, Yew KS. Diagnosis of chronic obstructive pulmonary disease. *Am Fam Physician*. 2008;78(1):87-92.

17. Apple F KP, Hammarsten O, Saenger A, Body R, Lam SPC, Collinson P, Jaffe A, Ordoñez-Llanos J, Omland T. Committee on Clinical Applications of Cardiac Bio-Markers (C-CB). . High-Sensitivity\* Cardiac Troponin I and T Assay Analytical Characteristics Designated by Manufacturer v072020 [www.iffc.org](http://www.iffc.org): The International Federation of Clinical Chemistry and Laboratory Medicine; 2020 [Available from: <https://www.iffc.org/media/478592/high-sensitivity-cardiac-troponin-i-and-t-assay-analytical-characteristics-designated-by-manufacturer-v072020.pdf>].
18. Levey AS, Coresh J, Greene T, Stevens LA, Zhang YL, Hendriksen S, et al. Using standardized serum creatinine values in the modification of diet in renal disease study equation for estimating glomerular filtration rate. *Ann Intern Med*. 2006;145(4):247-54.
